# Supplementary material for: p38γ Mitogen-Activated Protein Kinase Is a Key Regulator in Skeletal Muscle Metabolic Adaptation in Mice
Source: PLoS One. 2009 Nov 20;4(11):e7934. doi: 10.1371/journal.pone.0007934 (PMC2775956; doi:10.1371/journal.pone.0007934)
Supplement: Table S1 — The probesets, gene names and symbols for the cluster of genes whose expression is up-regulated in skeletal muscle in response to motor nerve stimulation in tibialis anterior muscle. (0.05 MB XLS) [file pone.0007934.s003.xls]

## Sheet: Muscle_Stimulation
Probe Sets	Abbreviated gene name	Full gene name
1425622_at	Edil3	EGF-like repeats and discoidin I-like domains 3
1420197_at	Gadd45b	Growth arrest and DNA-damage-inducible 45 beta
1450971_at	Gadd45b	growth arrest and DNA-damage-inducible 45 beta
1449773_s_at	Gadd45b	growth arrest and DNA-damage-inducible 45 beta
1454221_a_at	Kif2c	kinesin family member 2C
1456546_at	1700097N02Rik	RIKEN cDNA 1700097N02 gene
1420572_at	Ms4a3	membrane-spanning 4-domains, subfamily A, member 3
1420217_x_at	---	---
1424262_at	2810003C17Rik	RIKEN cDNA 2810003C17 gene
1418853_at	Apon	apolipoprotein N
1424273_at	Cyp2c70	cytochrome P450, family 2, subfamily c, polypeptide 70
1420720_at	LOC100044234 /// Nptx2	neuronal pentraxin 2 /// hypothetical protein LOC100044234
1451635_at	C730048C13Rik /// D630002G06Rik	RIKEN cDNA D630002G06 gene /// RIKEN cDNA C730048C13 gene
1426802_at	2008-09-08	septin 8
1459814_at	Tmem109	transmembrane protein 109
1451682_at	Zfp142	zinc finger protein 142
1417129_a_at	Meis2	Meis homeobox 2
1427873_at	Defcr15	defensin related cryptdin 15
1421310_at	4921517D21Rik	RIKEN cDNA 4921517D21 gene
1422233_at	Elk4	ELK4, member of ETS oncogene family
1425218_a_at	Scgb3a2	secretoglobin, family 3A, member 2
1420419_a_at	Otof	otoferlin
1456734_at	Txn1	thioredoxin 1
1419982_s_at	---	---
1460480_at	Erv3	endogenous retroviral sequence 3
1425241_a_at	Wsb1	WD repeat and SOCS box-containing 1
1418932_at	LOC100046232 /// Nfil3	nuclear factor, interleukin 3, regulated /// similar to NFIL3/E4BP4 transcription factor
1450750_a_at	Nr4a2	nuclear receptor subfamily 4, group A, member 2
1420041_at	---	---
1456744_x_at	Flcn	folliculin
1418424_at	Tnfaip6	tumor necrosis factor alpha induced protein 6
1416755_at	Dnajb1	DnaJ (Hsp40) homolog, subfamily B, member 1
1449231_at	Zfp296	zinc finger protein 296
1416756_at	Dnajb1	DnaJ (Hsp40) homolog, subfamily B, member 1
1422134_at	Fosb	FBJ osteosarcoma oncogene B
1437721_at	Coro1c	coronin, actin binding protein 1C
1419149_at	Serpine1	serine (or cysteine) peptidase inhibitor, clade E, member 1
1417484_at	Ibsp /// LOC100046052	integrin binding sialoprotein /// similar to Integrin binding sialoprotein
1421108_at	Cml2	camello-like 2
1418282_x_at	Serpina1b	serine (or cysteine) preptidase inhibitor, clade A, member 1b
1452382_at	Dnm3os	dynamin 3, opposite strand
1448793_a_at	Sdc4	syndecan 4
1424511_at	Aurka	aurora kinase A
1424030_at	Grhl1 /// LOC100043996	grainyhead-like 1 (Drosophila) /// similar to Grhl1 protein
1453840_at	Pabpc1	poly A binding protein, cytoplasmic 1
1449153_at	Mmp12	matrix metallopeptidase 12
1418649_at	Egln3	EGL nine homolog 3 (C. elegans)
1416617_at	Acss1	acyl-CoA synthetase short-chain family member 1
1448663_s_at	Mvd	mevalonate (diphospho) decarboxylase
1418480_at	Ppbp	pro-platelet basic protein
1455269_a_at	Coro1a	coronin, actin binding protein 1A
1426808_at	Lgals3	lectin, galactose binding, soluble 3
1456005_a_at	Bcl2l11	BCL2-like 11 (apoptosis facilitator)
1435449_at	Bcl2l11	BCL2-like 11 (apoptosis facilitator)
1420992_at	Ankrd1	ankyrin repeat domain 1 (cardiac muscle)
1420991_at	Ankrd1	ankyrin repeat domain 1 (cardiac muscle)
1416953_at	Ctgf	connective tissue growth factor
1449073_at	Flnc	filamin C, gamma (actin binding protein 280)
1422776_at	Serpinb8	serine (or cysteine) peptdiase inhibitor, clade B, member 8
1452318_a_at	Hspa1b	heat shock protein 1B
1427127_x_at	Hspa1b	heat shock protein 1B
1427126_at	Hspa1b	heat shock protein 1B
1452388_at	Hspa1a	heat shock protein 1A
1449461_at	Rbp7	retinol binding protein 7, cellular
1425840_a_at	Sema3f	sema domain, immunoglobulin domain (Ig), short basic domain, secreted, (semaphorin) 3F
1435089_at	2010111I01Rik	RIKEN cDNA 2010111I01 gene
1422615_at	Map4k4	mitogen-activated protein kinase kinase kinase kinase 4
1438556_a_at	Tmod3	tropomodulin 3
1426894_s_at	C230093N12Rik	RIKEN cDNA C230093N12 gene
1439264_x_at	Lasp1	LIM and SH3 protein 1
1455470_x_at	Lasp1	LIM and SH3 protein 1
1438634_x_at	Lasp1	LIM and SH3 protein 1
1452294_at	Pcdh1	protocadherin 1
1416295_a_at	Il2rg	interleukin 2 receptor, gamma chain
1423089_at	Tmod3	tropomodulin 3
1448698_at	Ccnd1	cyclin D1
1417420_at	Ccnd1	cyclin D1
1423088_at	Tmod3	tropomodulin 3
1426452_a_at	Rab30	RAB30, member RAS oncogene family
1426914_at	Marveld2	MARVEL (membrane-associating) domain containing 2
1455019_x_at	Ckap4	cytoskeleton-associated protein 4
1438705_at	Cbfa2t3	core-binding factor, runt domain, alpha subunit 2, translocated to, 3 (human)
1418582_at	Cbfa2t3	core-binding factor, runt domain, alpha subunit 2, translocated to, 3 (human)
1423797_at	Aacs	acetoacetyl-CoA synthetase
1416431_at	Tubb6	tubulin, beta 6
1452151_at	Gramd4	GRAM domain containing 4
1433966_x_at	Asns	asparagine synthetase
1420715_a_at	Pparg	peroxisome proliferator activated receptor gamma
1448688_at	Podxl	podocalyxin-like
1433883_at	Tpm4	tropomyosin 4
1456395_at	Ppargc1a	peroxisome proliferative activated receptor, gamma, coactivator 1 alpha
1434100_x_at	---	Transcribed locus, strongly similar to NP_037393.1 peroxisome proliferator-activated receptor gamma, coactivator 1 alpha [Homo sapiens]
1434099_at	---	Transcribed locus, strongly similar to NP_037393.1 peroxisome proliferator-activated receptor gamma, coactivator 1 alpha [Homo sapiens]
1460336_at	Ppargc1a	peroxisome proliferative activated receptor, gamma, coactivator 1 alpha
1437751_at	Ppargc1a	peroxisome proliferative activated receptor, gamma, coactivator 1 alpha
1450414_at	Pdgfb	platelet derived growth factor, B polypeptide
1450413_at	Pdgfb	platelet derived growth factor, B polypeptide
1419589_at	Cd93	CD93 antigen
1417930_at	Nab2	Ngfi-A binding protein 2
1449439_at	Klf7	Kruppel-like factor 7 (ubiquitous)
1416022_at	Fabp5	fatty acid binding protein 5, epidermal
1416021_a_at	Fabp5 /// LOC620603	fatty acid binding protein 5, epidermal /// similar to Fatty acid binding protein 5, epidermal
1450656_at	Gna13	guanine nucleotide binding protein, alpha 13
1422555_s_at	Gna13	guanine nucleotide binding protein, alpha 13
1422562_at	Rrad	Ras-related associated with diabetes
1460302_at	Thbs1	thrombospondin 1
1421811_at	LOC640441 /// Thbs1	thrombospondin 1 /// similar to thrombospondin 1
1449937_at	Pp11r	placental protein 11 related
1450850_at	Ezr /// LOC100044177	ezrin /// hypothetical protein LOC100044177
1427344_s_at	Rasd2	RASD family, member 2
1427343_at	Rasd2	RASD family, member 2
1450716_at	Adamts1	a disintegrin-like and metallopeptidase (reprolysin type) with thrombospondin type 1 motif, 1
1450786_x_at	Pdlim5	PDZ and LIM domain 5
1417894_at	Gpr97	G protein-coupled receptor 97
1425359_at	Mall	mal, T-cell differentiation protein-like
1425415_a_at	Slc1a1	solute carrier family 1 (neuronal/epithelial high affinity glutamate transporter, system Xag), member 1
1428016_a_at	Rasip1	Ras interacting protein 1
1416304_at	Litaf	LPS-induced TN factor
1420401_a_at	AB182283 /// LOC100046186 /// Ramp3	receptor (calcitonin) activity modifying protein 3 /// cDNA sequence AB182283 /// similar to receptor activity modifying protein 3
1452352_at	Ctla2b	cytotoxic T lymphocyte-associated protein 2 beta
1448471_a_at	Ctla2a	cytotoxic T lymphocyte-associated protein 2 alpha
1416811_s_at	Ctla2a /// Ctla2b	cytotoxic T lymphocyte-associated protein 2 alpha /// cytotoxic T lymphocyte-associated protein 2 beta
1451538_at	Sox9	SRY-box containing gene 9
1421279_at	Lamc2	laminin, gamma 2
1416601_a_at	Rcan1	regulator of calcineurin 1
1416600_a_at	Rcan1	regulator of calcineurin 1
1451415_at	1810011O10Rik	RIKEN cDNA 1810011O10 gene
1418322_at	Crem	cAMP responsive element modulator
1426047_a_at	Ptprr	protein tyrosine phosphatase, receptor type, R
1425761_a_at	Nfatc1	nuclear factor of activated T-cells, cytoplasmic, calcineurin-dependent 1
1422573_at	Ampd3	AMP deaminase 3
1421079_at	Nr4a3	nuclear receptor subfamily 4, group A, member 3
1452418_at	1200016E24Rik	RIKEN cDNA 1200016E24 gene
1423392_at	Clic4	chloride intracellular channel 4 (mitochondrial)
1451596_a_at	Sphk1	sphingosine kinase 1
1425282_at	Rnf144b	ring finger protein 144B
1431541_at	Stt3b	STT3, subunit of the oligosaccharyltransferase complex, homolog B (S. cerevisiae)
1429177_x_at	Sox17	SRY-box containing gene 17
1421560_at	Snai3	snail homolog 3 (Drosophila)
1418326_at	LOC100047619 /// Slc7a5	solute carrier family 7 (cationic amino acid transporter, y+ system), member 5 /// similar to solute carrier family 7 (cationic amino acid transporter, y+ system), member 5
1437302_at	Adrb2	adrenergic receptor, beta 2
1430295_at	Gna13	guanine nucleotide binding protein, alpha 13
1426897_at	Rcc2	regulator of chromosome condensation 2
1435176_a_at	Id2	inhibitor of DNA binding 2
1418102_at	Hes1	hairy and enhancer of split 1 (Drosophila)
1415999_at	Hey1	hairy/enhancer-of-split related with YRPW motif 1
1437132_x_at	Nedd9	neural precursor cell expressed, developmentally down-regulated gene 9
1421031_a_at	2310016C08Rik	RIKEN cDNA 2310016C08 gene
1416442_at	Ier2	immediate early response 2
1423389_at	Smad7	MAD homolog 7 (Drosophila)
1422818_at	Nedd9	neural precursor cell expressed, developmentally down-regulated gene 9
1451340_at	Arid5a	AT rich interactive domain 5A (Mrf1 like)
1426063_a_at	Gem	GTP binding protein (gene overexpressed in skeletal muscle)
1422286_a_at	Tgif1	TG interacting factor 1
1419220_at	Xirp1	xin actin-binding repeat containing 1
1418572_x_at	Tnfrsf12a	tumor necrosis factor receptor superfamily, member 12a
1418571_at	Tnfrsf12a	tumor necrosis factor receptor superfamily, member 12a
1420973_at	Arid5b /// LOC100044968	AT rich interactive domain 5B (Mrf1 like) /// similar to modulator recognition factor 2
1455271_at	LOC620695	hypothetical protein LOC620695
1449363_at	Atf3	activating transcription factor 3
1450698_at	Dusp2	dual specificity phosphatase 2
1417621_at	Nfatc1	nuclear factor of activated T-cells, cytoplasmic, calcineurin-dependent 1
1453287_at	5730557B15Rik	RIKEN cDNA 5730557B15 gene
1423396_at	Agt	angiotensinogen (serpin peptidase inhibitor, clade A, member 8)
1434901_at	Zbtb2	zinc finger and BTB domain containing 2
1428983_at	Scx	scleraxis
1452226_at	LOC100047340 /// Rcc2	regulator of chromosome condensation 2 /// hypothetical protein LOC100047340
1420909_at	Vegfa	vascular endothelial growth factor A
1420502_at	Sat1	spermidine/spermine N1-acetyl transferase 1
1417516_at	Ddit3	DNA-damage inducible transcript 3
1438824_at	Slc20a1	solute carrier family 20, member 1
1423100_at	Fos	FBJ osteosarcoma oncogene
1450505_a_at	1810015C04Rik	RIKEN cDNA 1810015C04 gene
1448029_at	Tbx3	T-box 3
1424143_a_at	Cdt1	chromatin licensing and DNA replication factor 1
1418616_at	Mafk	v-maf musculoaponeurotic fibrosarcoma oncogene family, protein K (avian)
1443969_at	Irs2	insulin receptor substrate 2
1417719_at	Sap30	sin3 associated polypeptide
1448568_a_at	Slc20a1	solute carrier family 20, member 1
1415911_at	Impact	imprinted and ancient
1417065_at	Egr1	early growth response 1
1448272_at	Btg2	B-cell translocation gene 2, anti-proliferative
1425895_a_at	Id1	inhibitor of DNA binding 1
1417395_at	Klf4	Kruppel-like factor 4 (gut)
1417394_at	Klf4	Kruppel-like factor 4 (gut)
1416630_at	Id3	inhibitor of DNA binding 3
1418025_at	Bhlhb2	basic helix-loop-helix domain containing, class B2
1416308_at	Ugdh	UDP-glucose dehydrogenase
1421841_at	Fgfr3	fibroblast growth factor receptor 3
1427931_s_at	Pdxk	pyridoxal (pyridoxine, vitamin B6) kinase
1417109_at	Tinagl	tubulointerstitial nephritis antigen-like
1416303_at	Litaf	LPS-induced TN factor
1427475_a_at	Pdlim5	PDZ and LIM domain 5
1438606_a_at	Clic4	chloride intracellular channel 4 (mitochondrial)
1419706_a_at	Akap12	A kinase (PRKA) anchor protein (gravin) 12
1427929_a_at	Pdxk	pyridoxal (pyridoxine, vitamin B6) kinase
1423393_at	Clic4	chloride intracellular channel 4 (mitochondrial)
1448529_at	Thbd	thrombomodulin
1427930_at	Pdxk	pyridoxal (pyridoxine, vitamin B6) kinase
1455158_at	Itga3	integrin alpha 3
1427683_at	Egr2	early growth response 2
1424144_at	Cdt1	chromatin licensing and DNA replication factor 1
1449188_at	Midn	midnolin
1448890_at	Klf2	Kruppel-like factor 2 (lung)
1418936_at	Maff	v-maf musculoaponeurotic fibrosarcoma oncogene family, protein F (avian)
1427682_a_at	Egr2	early growth response 2
1416250_at	Btg2	B-cell translocation gene 2, anti-proliferative
1419204_at	Dll1	delta-like 1 (Drosophila)
1416564_at	Sox7	SRY-box containing gene 7
1448510_at	Efna1	ephrin A1
1416895_at	Efna1	ephrin A1
1454678_s_at	A130022J15Rik	RIKEN cDNA A130022J15 gene
1449135_at	Sox18	SRY-box containing gene 18
1439368_a_at	Slc9a3r2	solute carrier family 9 (sodium/hydrogen exchanger), member 3 regulator 2
1422860_at	Nts	neurotensin
1417151_a_at	Ntsr2	neurotensin receptor 2
1415899_at	Junb	Jun-B oncogene
1416529_at	Emp1	epithelial membrane protein 1
1415779_s_at	Actg1	actin, gamma, cytoplasmic 1
1450206_at	Dlc1	deleted in liver cancer 1
1451270_at	Dusp18	dual specificity phosphatase 18
1417303_at	Mvd	mevalonate (diphospho) decarboxylase
1424638_at	Cdkn1a	cyclin-dependent kinase inhibitor 1A (P21)
1421679_a_at	Cdkn1a	cyclin-dependent kinase inhibitor 1A (P21)
1417714_x_at	Hba-a1 /// Hba-a2	hemoglobin alpha, adult chain 1 /// hemoglobin alpha, adult chain 2
1422771_at	Smad6	MAD homolog 6 (Drosophila)
1427866_x_at	---	Beta globin
1418835_at	Phlda1	pleckstrin homology-like domain, family A, member 1
1448239_at	Hmox1	heme oxygenase (decycling) 1
1428942_at	Mt2	metallothionein 2
1422557_s_at	Mt1	metallothionein 1
1418350_at	Hbegf	heparin-binding EGF-like growth factor
1418349_at	Hbegf	heparin-binding EGF-like growth factor
1435137_s_at	1200015M12Rik /// 1200016E24Rik /// A130040M12Rik /// E430024C06Rik	RIKEN cDNA 1200015M12 gene /// RIKEN cDNA 1200016E24 gene /// RIKEN cDNA A130040M12 gene /// RIKEN cDNA E430024C06 gene
1427932_s_at	1200003I10Rik /// 1200015M12Rik /// 1200016E24Rik /// A130040M12Rik /// E430024C06Rik	RIKEN cDNA 1200003I10 gene /// RIKEN cDNA 1200015M12 gene /// RIKEN cDNA 1200016E24 gene /// RIKEN cDNA A130040M12 gene /// RIKEN cDNA E430024C06 gene
1453238_s_at	1200016E24Rik /// 3930401B19Rik /// A130040M12Rik /// E430024C06Rik	RIKEN cDNA 3930401B19 gene /// RIKEN cDNA 1200016E24 gene /// RIKEN cDNA A130040M12 gene /// RIKEN cDNA E430024C06 gene
1426726_at	LOC677319 /// Ppp1r10	protein phosphatase 1, regulatory subunit 10 /// similar to protein phosphatase 1, regulatory subunit 10
1418937_at	Dio2	deiodinase, iodothyronine, type II
1449984_at	Cxcl2	chemokine (C-X-C motif) ligand 2
1436853_a_at	Snca	synuclein, alpha
1438676_at	Mpa2l	macrophage activation 2 like
