# Supplementary material for: p38γ Mitogen-Activated Protein Kinase Is a Key Regulator in Skeletal Muscle Metabolic Adaptation in Mice
Source: PLoS One. 2009 Nov 20;4(11):e7934. doi: 10.1371/journal.pone.0007934 (PMC2775956; doi:10.1371/journal.pone.0007934)
Supplement: Table S2 — The enriched KEGG pathways in the gene cluster in skeletal muscle induced by motor nerve stimulation. (0.01 MB XLS) [file pone.0007934.s004.xls]

## Sheet: Stilmulation_kegg
#	Annotation	Total Genes With Ann	Your Genes (With Ann)	Your Genes (No Ann)	Genome (With Ann)	Genome (No Ann)	ln(Bayes factor)	neg ln(p value)	FE: neg ln(p value)	FE: neg ln(FDR)	Genes
1	path:hsa04010: MAPK signaling pathway	11	11	42	232	2845	2.56	6.88	6.22	3.08	DDIT3 DUSP2 ELK4 FGFR3 FLNC FOS GADD45B HSPA1A MAP4K4 PDGFB PTPRR
2	path:hsa04350: TGF-beta signaling pathway	6	6	47	79	2998	2.1	6.34	5.89	3.08	ID1 ID2 ID3 SMAD6 SMAD7 THBS1
3	path:hsa04510: Focal adhesion	9	9	44	225	2852	0.62	4.81	4.19	2.08	ACTG1 CCND1 FLNC IBSP ITGA3 LAMC2 PDGFB THBS1 VEGF
4	path:hsa04512: ECM-receptor interaction	5	5	48	81	2996	0.52	4.69	4.26	2.08	IBSP ITGA3 LAMC2 SDC4 THBS1
